# Supplementary material for: Abnormally Reduced Dorsomedial Prefrontal Cortical Activity and Effective Connectivity With Amygdala in Response to Negative Emotional Faces in Postpartum Depression
Source: Atypon-hosted journal article supplement (doi:10.1176/appi.ajp.2010.09081235), 2010-09-16

**Supplemental Figure Caption:**

Condition Contrast: Faces>Shapes. Neural areas in which face related activation was greater than shape related activation across subjects [ $F(1,28) \geq 7.75, p < 0.05$ , corrected]. Both the left and right amygdala were significantly more active for faces blocks than shape blocks.

Supplemental Figure 1.

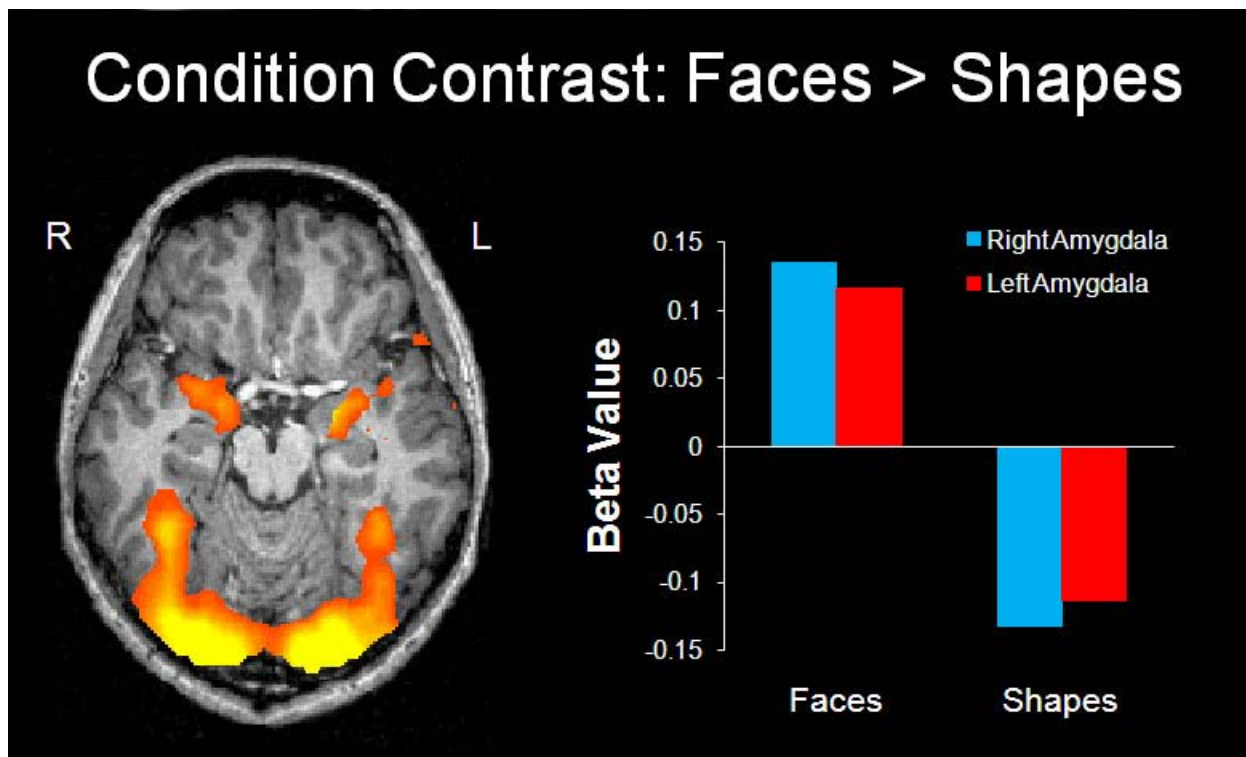

Supplement: appi.ajp.2010.09081235.ds001.pdf [file appi.ajp.2010.09081235.ds001.pdf]
